# Supplementary material for: TFEB induces mitochondrial itaconate synthesis to suppress bacterial growth in macrophages
Source: PubMed Central journal article supplement (PMC9314259; doi:10.1038/s42255-022-00605-w), 2022-07-21
Supplement: 42255_2022_605_MOESM1_ESM.pdf [file 42255_2022_605_MOESM1_ESM.pdf]

---

**Supplementary information**

---

**TFEB induces mitochondrial itaconate synthesis to suppress bacterial growth in macrophages**

---

In the format provided by the authors and unedited

## Supplementary Information

| Motif         | Transcription Factor     | p-value |
|---------------|--------------------------|---------|
| TCGTACCACT    | Zfp691                   | 1e-4    |
| CATTACCGTA    | Homeobox protein Nkx-6.1 | 1e-4    |
| GTGACTGTGTAT  | FOXH1                    | 1e-4    |
| AAAGGCACACGT  | Mlxip                    | 1e-4    |
| CACTAAAGGCC   | Homeobox protein Nkx-2.1 | 1e-4    |
| AGCAACTACTCC  | Hmx1                     | 1e-4    |
| ATCCACTCCTGA  | ZNF354C                  | 1e-4    |
| GCCAGTTACCT   | Spz1                     | 1e-4    |
| GAGCAACATGAT  | Homeobox protein Six1    | 1e-4    |
| GCTCAAGGTATC  | RAR:RXR (NR)             | 1e-4    |
| GGCCCTTGCCTA  | at_AC_acceptor           | 1e-4    |
| TCCTGCCCTTGAT | SREBF2                   | 1e-4    |
| TCCTTCTCAAT   | Irf3                     | 1e-4    |
| CAGTTGGTCTTT  | Mybl1                    | 1e-4    |
| TCCTAGCTATCT  | GATA                     | 1e-4    |
| GTTTGATCACCT  | Cux1                     | 1e-4    |
| TCTACAAGTGAT  | Zbtb3                    | 1e-4    |
| ACAAACCACAAT  | RUNX                     | 1e-4    |
| CCTCCCACCTCG  | TBX15                    | 1e-4    |
| CCCTTCACTGTT  | PRDM1                    | 1e-4    |
| ACCCGTCACCTC  | Eomes-2                  | 1e-4    |
| GTTGTCATGTCC  | TFEB                     | 1e-4    |
| TACCAGCTTGCA  | Tcf21                    | 1e-4    |
| ATTTTCACTCG   | Eomes-1                  | 1e-4    |
| GTGAGTTACAAT  | Homeobox protein Pknox1  | 1e-4    |
| GCACTATCTACT  | Mnx1                     | 1e-4    |
| CGGTCTAGCC    | SMAD3                    | 1e-4    |
| CACGTCCACT    | HIF-1A                   | 1e-3    |
| TACTTGAAAC    | Nkx-2.2                  | 1e-3    |
| GTATAAAGGC    | TATA-Box                 | 1e-3    |
| CCTAAACTGC    | BMXB (HTH)               | 1e-3    |
| ATGTGCTTAC    | NRL                      | 1e-3    |
| GACACAATC     | KLF10                    | 1e-3    |

### Supplementary Table 1. Potential *Irg1* regulators upon TFEB activation.

List of identified transcription factor binding motifs in significantly opened chromatin regions of the *Irg1* locus from ATAC-seq analysis (shown in Figure 4h) in TFEB-GFP- versus GFP-expressing BMDMs. Identified motifs are shown in column 1. Column 2 indicates the respective transcription factor. Column 3 represents the significance of enrichment of the binding motifs in the gained *Irg1* peaks calculated via the HOMER motif analysis software.

**Supplementary Table 2**  
**Oligonucleotide sequences**

| <b>Cloning primers</b>  |                                         |
|-------------------------|-----------------------------------------|
| Irg1-forw               | TTCAAGCTTGCCACCATGATGCTCAAGTCTGTCACAGAG |
| Irg1-rev                | GGCCCGCGGTACCTTGATATTGGTAAACCTGGGCAACG  |
| BFP-forw                | CCACCGGTCGCCACCATGAGCGAGCTGATTAAGGAG    |
| BFP-rev                 | TGTGCTGGCGGCCGCTCAATTAAGCTTGTGCCCCAG    |
| <b>RT-qPCR primers</b>  |                                         |
| Irg1-forw               | GCAACATGATGCTCAAGTCTG                   |
| Irg1-rev                | TGCTCCTCCGAATGATACCA                    |
| Tfeb-forw               | TGATCCCCAAGGCCAATGAC                    |
| Tfeb-rev                | TCCCTGGACTTTTGCAGGTC                    |
| b2m fw                  | CTGCTACGTAACACAGTTCCACCC                |
| b2m rev                 | CATGATGCTTGATCACATGTCTCG                |
| Actin fw                | TCGTTGCCGGTCCACACCCG                    |
| Actin rev               | CTTTGCACATGCCGGAGCCGT                   |
| <b>ChIP-qPCR primer</b> |                                         |
| -800bp_FW               | GGCCACCATTCTCACAAT                      |
| -800bp_RV               | ACGAGTAAGTGAGCATGGGT                    |
| -200bp_FW               | GTCTTCAAGAGTGGGATGCC                    |
| -200bp_RV               | ATAATTACAGAGGGATGGCCTG                  |
| negative-control_FW     | TGCTCCACAGTGTCCATGTACA                  |
| negative-control_RV     | AGCAATTCATGGGTGAGAGAAG                  |

# Supplementary Figure

## Flow cytometry gating strategy

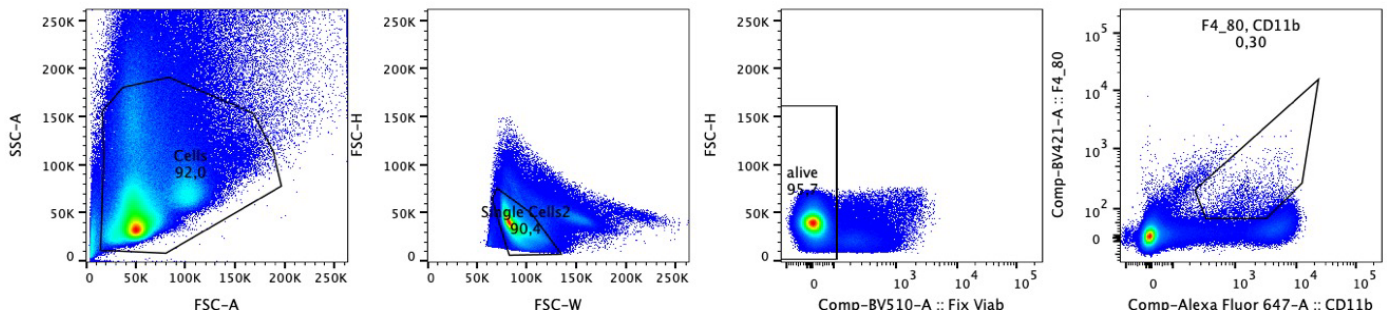

### Supplementary Figure 1: Flow cytometry gating strategy to identify splenic macrophages.

Relevant for Figure 4d, g and Extended Data Figure 4 c,h. From splenic cells suspensions (SSC-A to FSC-A), doublets (FSC-W to FCH-H) and dead cells (viable to FSC-H) were excluded. Macrophages were identified as double positive F4/80+ and CD11b+ population.
