# Supplementary material for: TFEB induces mitochondrial itaconate synthesis to suppress bacterial growth in macrophages
Source: PubMed Central journal article supplement (PMC9314259; doi:10.1038/s42255-022-00605-w), 2022-07-21
Supplement: 42255_2022_605_MOESM8_ESM.pdf [file 42255_2022_605_MOESM8_ESM.pdf]

# Source data Extended Fig. 2g

Unprocessed Western Blots

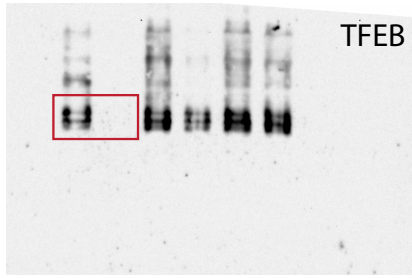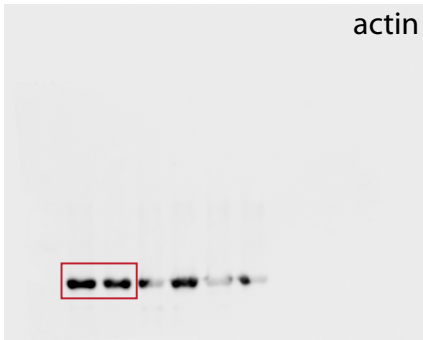

Red rectangles:  
lanes used for  
Extended Data  
Figure 2g.
