# Supplementary material for: TFEB induces mitochondrial itaconate synthesis to suppress bacterial growth in macrophages
Source: PubMed Central journal article supplement (PMC9314259; doi:10.1038/s42255-022-00605-w), 2022-07-21
Supplement: 42255_2022_605_MOESM13_ESM.pdf [file 42255_2022_605_MOESM13_ESM.pdf]

# Source data to Extended Data 5b

## Unprocessed Western Blots

Extended Data Figure 2b, left panel

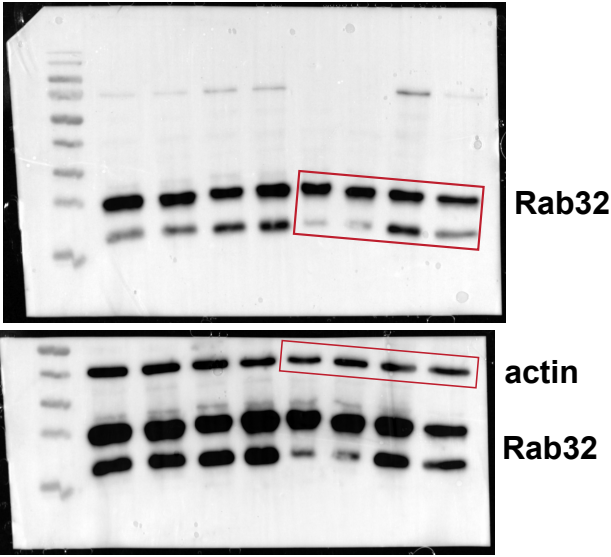

Red rectangles: lanes used for Extended Data Figure 5b left panel.

Extended Data Figure 2b, right panel

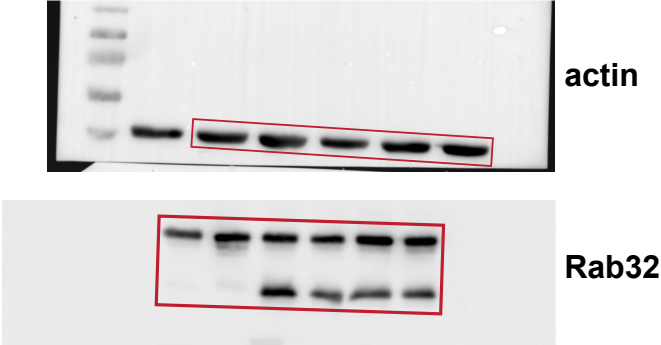

Red rectangles: lanes used for Extended Data Figure 5b right panel.
